RESEARCH ARTICLE

# Novel Phosphatidylinositol 4,5-Bisphosphate Binding Sites on Focal Adhesion Kinase

Jun Feng, Blake Mertz\*

The C. Eugene Bennett Department of Chemistry, West Virginia University, Morgantown, West Virginia, United States of America

\* [blake.mertz@mail.wvu.edu](mailto:blake.mertz@mail.wvu.edu)

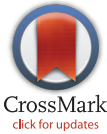

**OPEN ACCESS**

**Citation:** Feng J, Mertz B (2015) Novel Phosphatidylinositol 4,5-Bisphosphate Binding Sites on Focal Adhesion Kinase. PLoS ONE 10(7): e0132833. doi:10.1371/journal.pone.0132833

**Editor:** Colin Johnson, Oregon State University, UNITED STATES

**Received:** March 2, 2015

**Accepted:** June 18, 2015

**Published:** July 17, 2015

**Copyright:** © 2015 Feng, Mertz. This is an open access article distributed under the terms of the [Creative Commons Attribution License](https://creativecommons.org/licenses/by/4.0/), which permits unrestricted use, distribution, and reproduction in any medium, provided the original author and source are credited.

**Data Availability Statement:** All relevant data are within the paper and its Supporting Information files.

**Funding:** West Virginia University provided startup funds to conduct this research. The funders had no role in study design, data collection and analysis, decision to publish, or preparation of the manuscript.

**Competing Interests:** The authors have declared that no competing interests exist.

## Abstract

Focal adhesion kinase (FAK) is a protein tyrosine kinase that is ubiquitously expressed, recruited to focal adhesions, and engages in a variety of cellular signaling pathways. Diverse cellular responses, such as cell migration, proliferation, and survival, are regulated by FAK. Prior to activation, FAK adopts an autoinhibited conformation in which the FERM domain binds the kinase domain, blocking access to the activation loop and substrate binding site. Activation of FAK occurs through conformational change, and acidic phospholipids such as phosphatidylinositol 4,5-bisphosphate (PIP<sub>2</sub>) are known to facilitate this process. PIP<sub>2</sub> binding alters the autoinhibited conformation of the FERM and kinase domains and subsequently exposes the activation loop to phosphorylation. However, the detailed molecular mechanism of PIP<sub>2</sub> binding and its role in FAK activation remain unclear. In this study, we conducted coarse-grained molecular dynamics simulations to investigate the binding of FAK to PIP<sub>2</sub>. Our simulations identified novel areas of basic residues in the kinase domain of FAK that potentially undergo transient binding to PIP<sub>2</sub> through electrostatic attractions. Our investigation provides a molecular picture of PIP<sub>2</sub>-initiated FAK activation and introduces promising new pathways for future studies of FAK regulation.

## Introduction

Focal adhesions (FA) are integrin-mediated protein complexes that are found peripheral to the cell membrane at sites of cell attachment to the extracellular matrix (ECM) [1,2]. Focal adhesions establish a direct mechanical link between the actin cytoskeleton and the ECM and also act as cellular signaling integrators, sensing biochemical and mechanical stimuli from the extracellular environment. Diverse and critical biological events, including cell migration, proliferation, differentiation, and survival, are mediated by proteins localized to focal adhesions [3].

Focal adhesion kinase (FAK) is an essential component in the macromolecular assembly of focal adhesions, as well as a crucial kinase that participates in a variety of cellular signaling pathways [4]. FAK is involved in several developmental processes including angiogenesis [5] and axonal outgrowth [6]. In addition, dysregulation of FAK activity is linked to numerous pathological events such as tumorigenesis and metastasis [7]. Understanding the structural

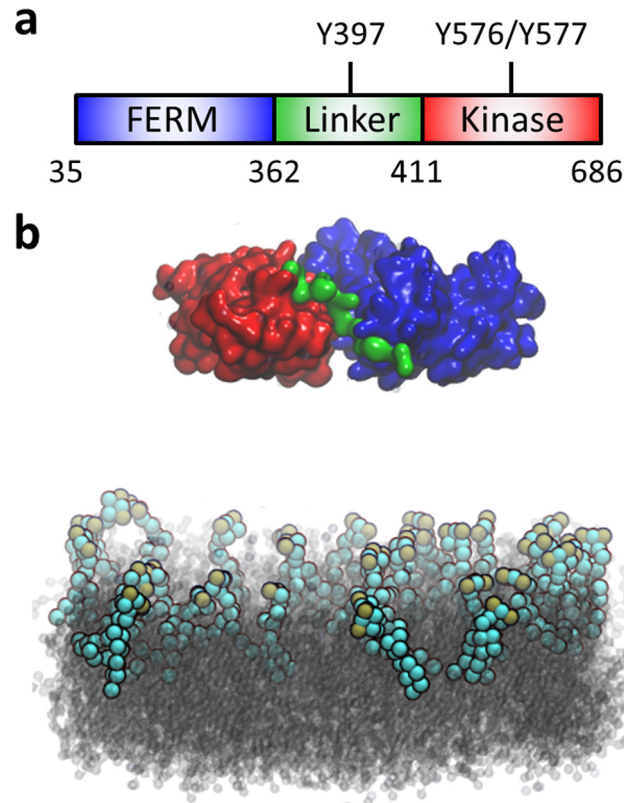

**Fig 1. Domain structure of FAK and illustration of the simulation system.** (a) The two N-terminal domains of FAK form the autoinhibited conformation and are connected via a linker. FERM domain: *blue*; kinase domain: *red*; linker: *green*. (b) FAK lies above a DOPC bilayer (*gray*) with 10% PIP<sub>2</sub> (*spheres*, cyan and ochre) in the upper leaflet. Ions and water molecules are omitted for clarity. All molecular graphics are rendered in VMD [13].

doi:10.1371/journal.pone.0132833.g001

underpinnings of FAK activation is essential to development of therapeutic treatments for these diseases. FAK is composed of 4 major domains: an N-terminal band 4.1, Ezrin, Radixin, Moesin (FERM) domain, a central tyrosine kinase domain followed by an unstructured pro-line-rich region, and a C-terminal focal adhesion targeting (FAT) domain. The FERM and kinase domains are separated by a linker containing the autophosphorylation site, Y397 (Fig 1). The FERM domain plays an essential autoinhibitory role in the regulation of the catalytic activity of FAK [8], in which the F2 subdomain contacts the C-lobe of the kinase domain, blocking access to the catalytic cleft and the activation loop (A-loop) [9]. As a result, the kinase domain remains locked in an inactive, unphosphorylated conformation. In addition, the linker between the FERM and kinase domains forms a beta strand that is part of a beta sheet within the F1 lobe, preventing autophosphorylation at Y397. It has been proposed [9,10] that a conformational change in the autoinhibited form of the FERM-kinase domain is the key initial step in FAK activation, exposing Y397 within the linker to phosphorylation [11] and subsequent recruitment of Src. Once Src binds to the linker, it phosphorylates two tyrosines within the exposed A-loop (Y576 and Y577) and renders FAK fully active [12].

FERM-interacting molecules, including growth factor receptors, p53, Ezrin, and acidic phospholipids, are known to play key roles in FAK regulation [14]. In particular, phosphatidylinositol 4,5-bisphosphate (PIP<sub>2</sub>) directly binds FAK in the FERM domain, inducing a conformational change and subsequent activation [10,15]. While PIP<sub>2</sub> binding is likely driven by

electrostatic forces [16], the molecular details of FAK binding to PIP<sub>2</sub>, the stoichiometry of binding, and the binding kinetics remain unknown. Determination of these binding characteristics is essential in order to understand PIP<sub>2</sub>-mediated activation of FAK.

We performed a series of modeling studies to investigate the molecular details of interactions between FAK and PIP<sub>2</sub>. Coarse-grained molecular dynamics (CGMD) [17,18] allows modeling of length and timescales that are significantly larger than all-atom molecular dynamics and are ideal for phenomena such as PIP<sub>2</sub> activation of FAK. CGMD simulations were carried out to examine the binding of FAK to bilayers containing PIP<sub>2</sub> lipids. Binding to the KAKTLRK basic patch within the FERM domain was observed, in agreement with experimental studies [10,15]; surprisingly, we also identified PIP<sub>2</sub> binding in the kinase domain. These results provide novel insight into the mechanisms controlling FAK activation, and could potentially identify new strategies to manipulate FAK regulation and treat disease.

## Computational Methods

FAK simulations were performed using the crystal structure of the autoinhibited conformation [9] (PDB 2J0J). Missing residues in the A-loop of the kinase domain (residues 574–583) were modeled as a random coil and further minimized using the molecular simulation package CHARMM c37b1 [19]. Missing residues from the linker region (residues 363–393) were not modeled due to its length and structural flexibility. The all-atom model was converted to a coarse-grained model with the MARTINI v2.2 force field [20], and backbone C<sub>α</sub> atoms were constrained by an elastic network [21] with a cutoff of 0.9 nm and a force constant of 500 kJ·mol<sup>-1</sup>. Simulation of FAK in water was initially carried out with the FERM and kinase domains allowed to move independently of one another. Deformation of the global structure occurred (results not shown), limiting all subsequent simulations with the FERM and kinase domains constrained as a single unit in the autoinhibited form. Another 1-μs-long simulation of FAK in water with the added constraint was carried out to verify that the system would remain stable.

To model the PIP<sub>2</sub>-containing lipid bilayer, we used an equilibrated DOPC bilayer of 15.2 nm × 15.2 nm in the x-y dimension and randomly replaced 10% of the DOPC molecules on the upper leaflet of the bilayer with PIP<sub>2</sub>, as per experimental studies [15], resulting in a lipid bilayer system composed of 629 DOPC molecules and 33 PIP<sub>2</sub> molecules. Finally, FAK was placed at distances of 4.5 nm (simulation I), 2.5 nm (simulation II), and 1.5 nm (simulation III), respectively, from the surface of the lipid bilayer, and 170 sodium ions and ≈27,000 polarized water molecules were added to the simulation box to make the final dimension of each system 15.2 nm × 15.2 nm × 19.1 nm with ≈92,000 particles (Fig 1).

All CGMD simulations were run in GROMACS v4.6 [22]. Simulations were performed in the isothermal-isobaric ensemble (*NPT*) with nonbond cutoff at 1.2 nm. Temperature was coupled at 320 K using a Berendsen thermostat with a coupling constant of 1 ps. The pressure was coupled to a Berendsen barostat at 1 bar with a relaxation time of 1 ps. Each simulation was run for 1 μs with an integration time step of 10 fs and system coordinates were collected every 10 ps. Given the relatively fast system equilibration and initial ligand-binding timescales, as well as the simulation length, the full trajectory is used for analysis unless stated otherwise. (Discussion of simulation convergence can be found in S5 Table.) Analysis was carried out with GROMACS analysis tools and custom-made scripts.

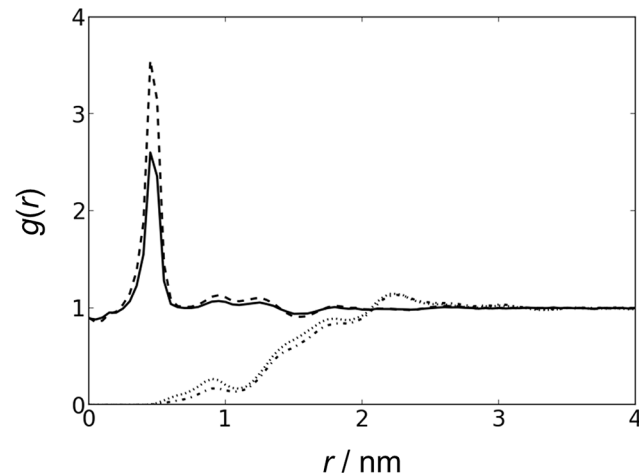

**Fig 2. FAK does not actively recruit PIP<sub>2</sub>.** RDF of ions as a function of distance to PIP<sub>2</sub> in the presence (solid line) and absence (dashed line) of FAK. RDF of PIP<sub>2</sub> as a function of distance to PIP<sub>2</sub> in the presence (dash-dotted line) and absence (dotted line) of FAK. All distances are measured with respect to the 1'-phosphate of PIP<sub>2</sub>. The final 900 ns of each simulation was used for analysis. Simulations II and III had very similar results and are therefore not shown.

doi:10.1371/journal.pone.0132833.g002

## Results

### A. FAK binds to PIP<sub>2</sub>-containing bilayers

As a system validation, we first simulated FAK in polarized water. The protein was stable with an average RMSD of  $\approx 0.3$  nm. Our next set of simulations allowed FAK to freely diffuse above a lipid bilayer. Radial distribution functions (RDF) of PIP<sub>2</sub> and ions to PIP<sub>2</sub> with and without FAK were calculated (Fig 2), and there is no notable difference in distribution in the presence or absence of FAK. This result indicates that the presence of FAK does not globally perturb the distribution of PIP<sub>2</sub> within the lipid bilayer, ruling out the possibility that FAK actively recruits large clusters of PIP<sub>2</sub> lipids. However, it is possible for PIP<sub>2</sub> to form clusters in the presence of divalent cations such as calcium, meaning that FAK could potentially interact with multiple PIP<sub>2</sub> molecules [23].

For all simulations, FAK was placed far enough from the lipid bilayer to ensure that binding to PIP<sub>2</sub> would occur through random diffusion, independent of initial orientation. Due to the use of periodic boundary conditions, FAK could freely diffuse and interact with each leaflet of the lipid bilayer (one leaflet containing PIP<sub>2</sub> and DOPC, the other leaflet containing only DOPC). This design was intentional, since PIP<sub>2</sub> is asymmetrically distributed *in vivo* [24–26]. Our simulations showed that FAK preferentially interacted with the PIP<sub>2</sub>-containing leaflet (Fig 3).

### B. Multiple association and dissociation events occur between FAK and PIP<sub>2</sub>

We next examined the propensity for FAK to interact with PIP<sub>2</sub> lipids (Table 1). FAK was considered to bind with PIP<sub>2</sub> if the minimal distance between any coarse-grained bead of FAK and any phosphate bead of PIP<sub>2</sub> was less than 0.52 nm. (Results are not sensitive to the cutoff—see S1–S4 Tables.) The average distance between PIP<sub>2</sub> and FAK was 0.48 nm  $\pm$  0.02 nm. FAK was bound to PIP<sub>2</sub> for at least 2/3 of the total simulation time (Table 2), with initial binding events occurring at 80, 18, and 30 ns, respectively (Fig 3). Binding was dynamic, as multiple events of PIP<sub>2</sub> association and dissociation were observed throughout the course of the simulations. In

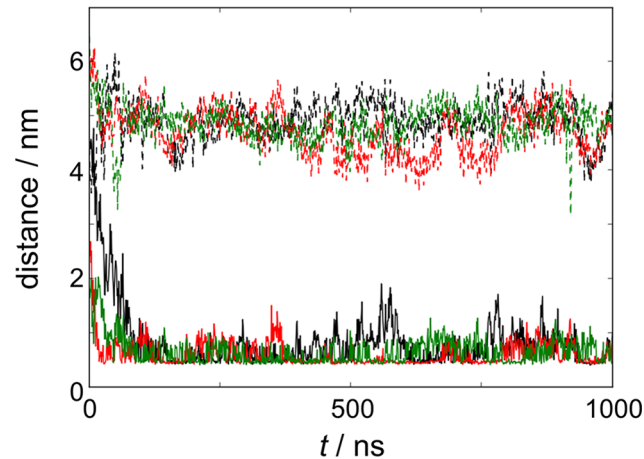

**Fig 3. FAK preferentially interacts with the PIP<sub>2</sub>-containing bilayer leaflet.** Minimal distance between FAK and DOPC leaflet with (solid line) and without PIP<sub>2</sub> (dashed line) in simulation I (black), II (red), and III (green)

doi:10.1371/journal.pone.0132833.g003

addition, when FAK was bound to PIP<sub>2</sub>, it can interact with multiple PIP<sub>2</sub> lipids (usually between 1–3 molecules), as determined by the percentage of time when FAK binds  $n_p$  number of PIP<sub>2</sub> lipids ( $n_p = 1–6$ ) (Table 2).

### C. Observed PIP<sub>2</sub> binding sites on FAK

To identify PIP<sub>2</sub> binding sites on FAK, the percentage of time  $x_i$  each residue interacts with PIP<sub>2</sub> is monitored using  $x_i = n_i/N$ , where  $n_i$  is the number of times residue  $i$  makes contact with PIP<sub>2</sub> and  $N$  is the total number of times FAK makes contact with PIP<sub>2</sub> during the simulation (Table 3). All identified interacting residues are basic (lysine or arginine) and thus capable of establishing electrostatic attractions with the highly negatively-charged PIP<sub>2</sub> head groups. Among these residues, we identified known PIP<sub>2</sub>-binding residues K216, K218, R221, and K222 (part of the KAKTLRK ridge) [15,27]. These residues lie on the surface of the F2 subdomain of the FERM domain and are critical for FAK activation. Surprisingly, we also observed additional basic residues not previously known to interact with PIP<sub>2</sub>, as will be detailed below.

To further characterize the binding sites, PIP<sub>2</sub>-interacting residues were grouped based upon their location on the protein surface, designated Group I and Group II (Table 4 and Fig 4). Group I residues are located at the interface between the F2 subdomain of the FERM domain along the functionally important KAKTLRK ridge [15,27] and directly adjacent in the

**Table 1. Comparison of PIP<sub>2</sub> and PC lipids involved in FAK binding.**

| Simulation | % time of binding |      | $N_L^a$ ( $x_i > 10\%$ ) <sup>b</sup> |    | $N_L$ ( $x_i > 5\%$ ) |    |
|------------|-------------------|------|---------------------------------------|----|-----------------------|----|
|            | PIP <sub>2</sub>  | PC   | PIP <sub>2</sub>                      | PC | PIP <sub>2</sub>      | PC |
| I          | 68.1              | 31.8 | 9                                     | 0  | 12                    | 7  |
| II         | 88.2              | 58.4 | 8                                     | 1  | 13                    | 17 |
| III        | 84.6              | 39.1 | 7                                     | 0  | 12                    | 1  |

<sup>a</sup>  $N_L$  is defined as the number of lipids that make contact over 10% or 5% of simulation time.

<sup>b</sup> The contact percentage of PIP<sub>2</sub>/PC lipids is calculated as the number of times a specific PIP<sub>2</sub>/PC lipid made contact with FAK normalized by the total number of times FAK established contact with PIP<sub>2</sub>/PC lipids.

doi:10.1371/journal.pone.0132833.t001

**Table 2. Quantification of FAK binding to PIP<sub>2</sub>.**

| Simulation | % time of binding <sup>a</sup> | <i>n<sub>P</sub></i> PIP <sub>2</sub> bound to FAK, % time of binding <sup>b</sup> |      |      |     |
|------------|--------------------------------|------------------------------------------------------------------------------------|------|------|-----|
|            |                                | 1                                                                                  | 2    | 3    | 4–6 |
| I          | 68.1                           | 40.5                                                                               | 35.5 | 17.6 | 6.4 |
| II         | 88.2                           | 28.7                                                                               | 41.0 | 24.1 | 6.3 |
| III        | 84.6                           | 38.9                                                                               | 37.3 | 17.9 | 5.9 |

<sup>a</sup> Percentage of time FAK is bound to PIP<sub>2</sub> during simulation.

<sup>b</sup> Percentage of time FAK is bound to *n<sub>P</sub>* number of PIP<sub>2</sub>.

doi:10.1371/journal.pone.0132833.t002

C-lobe of the kinase domain. These two clusters in Group I (the KAKTLRK ridge and the C-lobe of the kinase domain) are proximal to each other and may form part of a larger phospholipid binding site. Group II residues are completely new and represent a potential binding site suggested by our simulations, located near the interface between the N- and C-lobes of the kinase domain. Both Group I and Group II binding sites are tightly correlated to the two basic patches on the electrostatic potential surface of the protein (Fig 4).

#### D. FAK adopts multiple binding poses with PIP<sub>2</sub>

Group I and Group II interactions with PIP<sub>2</sub> account for the majority of FAK-PIP<sub>2</sub> contacts and are independent of one another (Table 5). However, preferential orientations of FAK with respect to the lipid bilayer do occur. Interactions involving only Group I required both the KAKTLRK ridge and C-lobe of the kinase domain to be effaced with the lipid bilayer (Fig 5A). When both Group I and Group II sites interacted with PIP<sub>2</sub>, a tilted orientation with the Group II site on the C-lobe facing the bilayer surface occurred (Fig 5B). Finally, when only Group II preferentially interacted with PIP<sub>2</sub>, it required an orientation in which the C-lobe was heavily tilted towards and almost parallel to the bilayer (Fig 5C).

### Discussion

The computational studies carried out have led us to more carefully consider the mechanism of PIP<sub>2</sub> binding to FAK and the potential effects on FAK activation. When PIP<sub>2</sub>-FAK interactions were first discovered, it was shown that the highly basic KAKTLRK ridge (part of the F2 lobe in the FERM domain) was necessary for PIP<sub>2</sub>-FAK binding *in vitro* and FAK activation *in vivo* [15,27]. More recently, vesicle pull-down and surface plasmon resonance studies identified that the combined kinase and FERM domains of FAK in the autoinhibited conformation bind less effectively to PIP<sub>2</sub>-containing bilayers than the FERM domain alone, indicating that the autoinhibitory conformation of FAK is predisposed to decreasing the favorability of PIP<sub>2</sub> binding [10]. The motivation for our CGMD studies was to gain molecular insight into these interactions, with the expectation that the interactions would remain localized to the FERM

**Table 3. Percentage of time (*x<sub>i</sub>*) individual residues contact PIP<sub>2</sub>.**

| Simulation | K191 <sup>a</sup> | K216 | K218 | R221 | K222 | R229 | R508 | R514 | K515 | K578 | K621 | K627 | R640 | K657 | R665 |
|------------|-------------------|------|------|------|------|------|------|------|------|------|------|------|------|------|------|
| I          | 7.8               | 8.6  | 18.2 | 1.3  | 20.6 | 17.4 | 7.3  | 4.8  | 19.0 | 27.7 | 22.3 | 35.6 | 18.9 | 5.4  | 10.4 |
| II         | 4.1               | 5.9  | 12.2 | 1.9  | 7.3  | 4.8  | 27.8 | 11.2 | 13.1 | 37.8 | 53.1 | 39.4 | 16.5 | 6.9  | 11.0 |
| III        | 11.0              | 7.3  | 23.4 | 10.5 | 21.7 | 16.6 | 0.0  | 3.5  | 22.6 | 35.4 | 15.7 | 48.0 | 19.5 | 6.4  | 10.5 |

<sup>a</sup> Residues with *x<sub>i</sub>* > 5% in at least two simulations or *x<sub>i</sub>* > 10% in any simulation.

doi:10.1371/journal.pone.0132833.t003

**Table 4. Grouping of PIP<sub>2</sub> interaction sites.**

| Group I  | F2 <sup>a</sup> | K191 | K216 | K218 | R221 | K222 | R229 |
|----------|-----------------|------|------|------|------|------|------|
|          | C-lobe          | R640 | K657 | R665 |      |      |      |
| Group II | N-lobe & C-lobe | R508 | R514 | K515 | K578 | K621 | K627 |

<sup>a</sup> F2 is part of the FERM domain, N- and C-lobes are part of the kinase domain.

doi:10.1371/journal.pone.0132833.t004

domain. Our simulation faithfully reproduced the known PIP<sub>2</sub> binding sites located on the basic patch of the FERM domain (Group I). However, observing interactions of Group II residues within the kinase domain with PIP<sub>2</sub> was completely unexpected. Although the previously-mentioned studies indicate the majority of PIP<sub>2</sub> binding to FAK occurs within the vicinity of the KAKTLRK ridge, residual binding observed in the KAKTLRK mutant [10] may be due to additional interaction sites as proposed here. Our results indicate that the kinase domain (Group II) could represent a viable site for secondary binding of PIP<sub>2</sub>.

Our simulations indicate that FAK-PIP<sub>2</sub> interaction is mainly nonspecific due to the electrostatic nature of binding, and agrees well with the lack of influence on FAK activation in the presence of neutrally-charged phospholipids such as DOPC [10,15]. A large number of basic residues on the FAK surface established contact with PIP<sub>2</sub>. The residues engaging frequent contact in each simulation remain largely consistent (S5 Table), indicating a converged identification of PIP<sub>2</sub>-binding residues. Due to the constraints of our protein model, there are potential PIP<sub>2</sub>-interacting residues that may not have been identified by our CGMD simulation. For example, R184 and K190 in the FERM domain (the KAKTLRK ridge), which were shown to be key residues in the allosteric relationship between ATP and PIP<sub>2</sub> binding [29], and R634 on the kinase domain bridge the Group I and Group II sites but are inaccessible to PIP<sub>2</sub> in the autoinhibited conformation. However, multiple association and dissociation events were observed, which is supported by the fact that the probability distribution of the principal axis of FAK with respect to the membrane normal showed that no prolonged binding pose existed (S1 Fig).

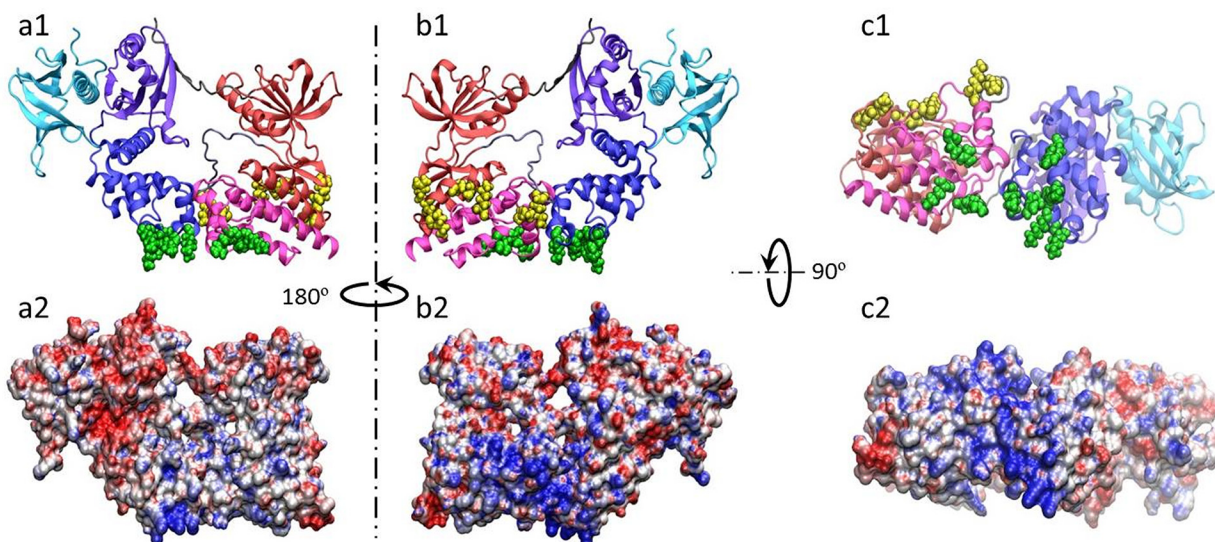

**Fig 4. Group I and II interaction sites correspond to large basic patches in FAK.** a1, b1, and c1: Mapping of Group I (green) and Group II (yellow) residues onto the crystal structure of FAK (F1 (violet), F2 (blue), and F3 (cyan) subdomains of the FERM domain, N-lobe (red), A-loop (iceblue), and C-lobe (magenta) of the kinase domain, and linker (gray)). a2, b2, and c2: Electrostatic potential surface of FAK kinase calculated using APBS [28]. The view of the electrostatic potential surface in a2, b2, and c2 corresponds to the orientation shown in a1, b1, and c1, respectively.

doi:10.1371/journal.pone.0132833.g004

**Table 5. Percentage of time Group I and Group II sites contacted PIP<sub>2</sub> during FAK-PIP<sub>2</sub> interactions.**

| Simulation | Only Group I | Only Group II | I and II | Neither I or II |
|------------|--------------|---------------|----------|-----------------|
| I          | 31.4         | 42.6          | 23.2     | 2.8             |
| II         | 22.7         | 60.3          | 15.6     | 1.4             |
| III        | 25.3         | 40.7          | 32.6     | 1.4             |

doi:10.1371/journal.pone.0132833.t005

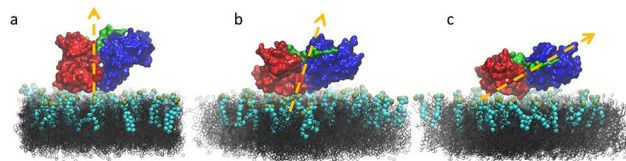

**Fig 5. FAK adopts a set of preferential orientations toward PIP<sub>2</sub>-containing lipid bilayers.** Arrows represent the direction from the center of mass of the F2 subdomain of the FERM domain and C-lobe of the kinase domain to the COM of the F1 subdomain of the FERM domain and N-lobe of the kinase domain. Color scheme is the same as Fig 1.

doi:10.1371/journal.pone.0132833.g005

These transient association dynamics mainly stem from the fact that the friction originating from fine-grained degrees of freedom present in an all-atom model is missing in the coarse-grained model used in this study [18,30,31]. Instead of association with a defined binding pocket, PIP<sub>2</sub> molecules maintain “stable” contact with residues located within Group I and Group II, interacting with the basic surfaces and sampling multiple binding complexes. This observed binding phenomena suggests mutations that could be tested experimentally to further characterize PIP<sub>2</sub> binding to FAK in the Group II basic patch, in particular R508, R514, K515, K621, and K627.

Our study has provided novel insight into potential PIP<sub>2</sub> interactions that have been shown to promote the conformational change responsible for FAK activation. The autoinhibitory interaction between the F2 subdomain of the FERM domain and the C-lobe of the kinase domain is formed by a network of charge complementarity, including interactions mediated by the KAKTLRK ridge and R634, a possible secondary PIP<sub>2</sub>-binding target that becomes exposed during separation of the two domains. PIP<sub>2</sub> binding could potentially weaken the interactions that stabilize the KAKTLRK ridge and R634 in the inactive conformation, leading to conformational change and phosphorylation of Y397. This secondary PIP<sub>2</sub> binding site may also stabilize FAK in its active conformation. The discovery of a second PIP<sub>2</sub> binding site on the FAK kinase domain (i.e., Group II) suggests additional mechanisms contributing to conformational change that could operate independently or in concert with the FERM domain. While the initial interaction might resemble the pose illustrated in Fig 5B, twisting the domains to simultaneously maximize KAKTLRK ridge and Group II interactions with PIP<sub>2</sub> could promote conformational change that affects the linker, exposing Y397 for phosphorylation. Further modeling and experimental studies are currently being conducted to fully elucidate the mechanism(s) of FAK activation in response to PIP<sub>2</sub> binding.

## Supporting Information

**S1 Table. Percentage of time individual residues interact with PIP<sub>2</sub> in simulation I using different cutoff values.** As the contact cutoff increases, the percentage of time when individual



residues make contacts increase accordingly.  
(DOCX)

**S2 Table. Percentage of time individual residues interact with PIP<sub>2</sub> in simulation II using different cutoff values.**  
(DOCX)

**S3 Table. Percentage of time individual residues interact with PIP<sub>2</sub> in simulation III using different cutoff values.**  
(DOCX)

**S4 Table. Effect of cutoff on the ranking of residues that contact PIP<sub>2</sub>.** The residues identified to bind PIP<sub>2</sub> remain unchanged, meaning our results are insensitive to the cutoff distance.  
(DOCX)

**S5 Table. Comparison of FAK residues that contact PIP<sub>2</sub> using reported results (Simulations I, II, and III) versus simulation with an initial configuration with FAK bound to bilayer surface.** Identified residues in simulation are well-converged. Ignoring the equilibration period in original simulations or starting an independent simulation from a PIP<sub>2</sub>-bound conformation has minimal effects on the amino acid residues from FAK that interact with PIP<sub>2</sub>.  
(DOCX)

**S1 Fig. No preferential binding pose exists between FAK and PIP<sub>2</sub>.** Probability ( $p$ ) of the first principal axis of FAK ( $V_z$ ) with respect to the bilayer normal ( $z$ ). The broad distribution indicates there is no preferential binding pose. *black*: simulation I; *red*: simulation II; *green*: simulation III.  
(TIFF)

**S2 Fig. Multiple dissociation and association events occur during FAK-PIP<sub>2</sub> binding.** Interaction energies between FAK and PIP<sub>2</sub> in simulation I. *red*: van der Waals energy; *black*: electrostatic energy. Several PIP<sub>2</sub>-FAK dissociation and association events occur, as indicated by the significant changes in the interaction energy.  
(TIFF)

**S3 Fig. Group II residues are highly conserved within a representative sample of the animal kingdom.** A sequence similarity search was carried out on the human version of focal adhesion kinase 1 (Uniprot Q05397) using the BLAST server [32]. Clustal Omega [33] was used to perform a multiple sequence alignment (MSA) on 25 different species from the animal kingdom (ranging from mammals to sea urchins), with all alignment variables set to their default values. The alignment was visually inspected and manually adjusted in Seaview [34], with the final alignment input into Scorecons [35]. Scorecons was used to quantify residue conservation with respect to the human version of FAK used in the sequence alignment. Each residue in Group II was highly conserved, with the majority being completely conserved. What is interesting to note is that K578 and K621 are both located in flexible loop regions (on the A-loop and near the C-lobe, respectively). When K578 is mutated along with K581 to glutamic acid, FAK's enzymatic activity is greatly enhanced ('SuperFAK' [36]), underscoring the key role K578 plays in activation of FAK, since it is next to the tyrosine residues that are phosphorylated by Src kinase (Y576 and Y577). In addition, the A-loop of FAK kinase was shown to be intimately involved in the allosteric pathway that exists between ATP and PIP<sub>2</sub> binding recently revealed by all-atom molecular dynamics simulations [37]. The role of K621 in FAK function, if any, is unclear. This residue was in contact with PIP<sub>2</sub> molecules for the longest duration in our

simulations, and this behavior could be linked to the flexible nature of the long loop that connects two of the  $\alpha$ -helices in the C-lobe of the kinase domain. Each of the Group II residues (except for K578, which is a well-characterized mutation) appear to be promising candidates for further experimental investigations into the effect they have on binding to PIP<sub>2</sub>. MSA was drawn using the ESPript 3.0 server [38] using default values for residue similarity scores (0.7). Similar residues are shown in bold type with white background, completely conserved residues are shown in white font with black background. *First row*: annotated secondary structure based on PDB 2J0J from avian *Gallus gallus*. *All other rows*: primary amino acid sequences of known FAK1 genes, listed by Uniprot identification numbers. *Green background and black triangles*: Group II residues. Scorecons results for Group II residues are listed below the MSA. (PDF)

## Acknowledgments

JF and BM would like to thank the WVU High Performance Computing shared facility for providing computational resources and J. Hall and M. Schaller for thoughtful discussion and interpretation of our results.

## Author Contributions

Conceived and designed the experiments: JF BM. Performed the experiments: JF. Analyzed the data: JF BM. Contributed reagents/materials/analysis tools: JF. Wrote the paper: JF BM.

## References

1. Burridge K, Fath K, Kelly T, Nuckolls G, Turner C (1988) Focal adhesions—transmembrane junctions between the extracellular-matrix and the cytoskeleton. *Annu Rev Cell Biol* 4: 487–525. PMID: [3058164](#)
2. Burridge K, Chrzanowska-Wodnicka M (1996) Focal adhesions, contractility, and signaling. *Annu Rev Cell Dev Biol* 12: 463–518. PMID: [8970735](#)
3. Mitra SK, Hanson DA, Schlaepfer DD (2005) Focal adhesion kinase: in command and control of cell motility. *Nat Rev Mol Cell Biol* 6: 56–68. PMID: [15688067](#)
4. Schlaepfer DD, Hauck CR, Sieg DJ (1999) Signaling through focal adhesion kinase. *Prog Biophys Mol Biol* 71: 435–478. PMID: [10354709](#)
5. Vadali K, Cai X, Schaller MD (2007) Focal adhesion kinase: an essential kinase in the regulation of cardiovascular functions. *IUBMB Life* 59: 709–716. PMID: [17968709](#)
6. Girault JA, Costa A, Derkinderen P, Studler JM, Toutant M (1999) FAK and PYK2/CAK beta in the nervous system: a link between neuronal activity, plasticity and survival? *Trends Neurosci* 22: 257–263. PMID: [10354603](#)
7. McLean GW, Carragher NO, Avizienyte E, Evans J, Brunton VG, Frame MC (2005) The role of focal adhesion kinase in cancer—a new therapeutic opportunity. *Nat Rev Cancer* 5: 505–515. PMID: [16069815](#)
8. Cooper LA, Shen TL, Guan JL (2003) Regulation of focal adhesion kinase by its amino-terminal domain through an autoinhibitory interaction. *Mol Cell Biol* 23: 8030–8041. PMID: [14585964](#)
9. Lietha D, Cai X, Ceccarelli DF, Li Y, Schaller MD, Eck MJ (2007) Structural basis for the autoinhibition of focal adhesion kinase. *Cell* 129: 1177–1187. PMID: [17574028](#)
10. Goni GM, Epifano C, Boskovic J, Camacho-Artacho M, Zhou J, Bronowska A, et al. (2014) Phosphatidylinositol 4,5-bisphosphate triggers activation of focal adhesion kinase by inducing clustering and conformational changes. *Proc Natl Acad Sci USA* 111: E3177–3186. doi: [10.1073/pnas.1317022111](#) PMID: [25049397](#)
11. Schaller MD, Hildebrand JD, Shannon JD, Fox JW, Vines RR, Parsons JT (1994) Autophosphorylation of the focal adhesion kinase, pp125FAK, directs SH2 dependent binding of pp60src. *Mol Cell Biol* 14: 1680–1688. PMID: [7509446](#)
12. Calalb MB, Polte TR, Hanks SK (1995) Tyrosine phosphorylation of focal adhesion kinase at sites in the catalytic domain regulates kinase activity: a role for Src family kinases. *Mol Cell Biol* 15: 954–963. PMID: [7529876](#)

13. Humphrey W, Dalke A, Schulten K (1996) VMD: visual molecular dynamics. *J Mol Graph* 14: 33–38. PMID: [8744570](#)
14. Frame MC, Patel H, Serrels B, Lietha D, Eck MJ (2010) The FERM domain: organizing the structure and function of FAK. *Nat Rev Mol Cell Biol* 11: 802–814. doi: [10.1038/nrm2996](#) PMID: [20966971](#)
15. Cai X, Lietha D, Ceccarelli DF, Karginov AV, Rajfur Z, Jacobson K, et al. (2008) Spatial and temporal regulation of focal adhesion kinase activity in living cells. *Mol Cell Biol* 28: 201–214. PMID: [17967873](#)
16. van den Bogaart G, Meyenberg K, Risselada HJ, Amin H, Willig KI, Hubrich BE, et al. (2011) Membrane protein sequestering by ionic protein-lipid interactions. *Nature* 479: 552–555. doi: [10.1038/nature10545](#) PMID: [22020284](#)
17. Marrink SJ, Risselada HJ, Yefimov S, Tieleman DP, de Vries AH (2007) The MARTINI force field: Coarse grained model for biomolecular simulations. *J Phys Chem B* 111: 7812–7824. PMID: [17569554](#)
18. Periole X, Marrink SJ (2013) The Martini coarse-grained force field. *Methods Mol Biol* 924: 533–565. doi: [10.1007/978-1-62703-017-5\\_20](#) PMID: [23034762](#)
19. Brooks BR, Brooks CL, Mackerell AD, Nilsson L, Petrella RJ, Roux B, et al. (2009) CHARMM: the biomolecular simulation program. *J Comput Chem* 30: 1545–1614. doi: [10.1002/jcc.21287](#) PMID: [19444816](#)
20. de Jong DH, Singh G, Bennett WFD, Arnarez C, Wassenaar TA, Schäfer LV, et al. (2012) Improved parameters for the Martini coarse-grained protein force field. *J Chem Theory Comput* 9: 687–697.
21. Periole X, Cavalli M, Marrink S-J, Ceruso MA (2009) Combining an elastic network with a coarse-grained molecular force field: structure, dynamics, and intermolecular recognition. *J Chem Theory Comput* 5: 2531–2543.
22. Hess B, Kutzner C, van der Spoel D, Lindahl E (2008) GROMACS 4: algorithms for highly efficient, load-balanced, and scalable molecular simulation. *J Chem Theory Comput* 4: 435–447.
23. Ellenbroek WG, Wang Y-H, Christian DA, Discher DE, Janmey PA, Liu AJ (2011) Divalent Cation-Dependent Formation of Electrostatic PIP2 Clusters in Lipid Monolayers. *Biophys J* 101: 2178–2184. doi: [10.1016/j.bpj.2011.09.039](#) PMID: [22067156](#)
24. Bretsche MS (1972) Asymmetrical lipid bilayer structure for biological-membranes. *Nature New Biol* 236: 11–12. PMID: [4502419](#)
25. Irino Y, Tokuda E, Hasegawa J, Itoh T, Takenawa T (2012) Quantification and visualization of phosphoinositides by quantum dot-labeled specific binding-domain probes. *J Lipid Res* 53: 810–819. doi: [10.1194/jlr.D019547](#) PMID: [22308508](#)
26. Watt SA, Kular G, Fleming IN, Downes CP, Lucocq JM (2002) Subcellular localization of phosphatidylinositol 4,5-bisphosphate using the pleckstrin homology domain of phospholipase C delta 1. *Biochem J* 363: 657–666. PMID: [11964166](#)
27. Dunty JM, Gabarra-Niecko V, King ML, Ceccarelli DF, Eck MJ, Schaller MD (2004) FERM domain interaction promotes FAK signaling. *Mol Cell Biol* 24: 5353–5368. PMID: [15169899](#)
28. Baker NA, Sept D, Joseph S, Holst MJ, McCammon JA (2001) Electrostatics of nanosystems: application to microtubules and the ribosome. *Proc Natl Acad Sci USA* 98: 10037–10041. PMID: [11517324](#)
29. Zhou J, Bronowska A, Le Coq J, Lietha D, Graeter F (2015) Allosteric Regulation of Focal Adhesion Kinase by PIP2 and ATP. *Biophys J* 108: 698–705.
30. Marrink SJ, de Vries AH, Mark AE (2003) Coarse grained model for semiquantitative lipid simulations. *J Phys Chem B* 108: 750–760.
31. Baron R, Trzesniak D, de Vries AH, Elsener A, Marrink SJ, van Gunsteren WF (2007) Comparison of thermodynamic properties of coarse-grained and atomic-level simulation models. *ChemPhysChem* 8: 452–461. PMID: [17290360](#)
32. Altschul SF, Wootton JC, Gertz EM, Agarwala R, Morgulis A, Schäffer AA, et al. (2005) Protein database searches using compositionally adjusted substitution matrices. *FEBS Journal* 272: 5101–5109. PMID: [16218944](#)
33. Sievers F, Higgins DG (2014) Clustal Omega, Accurate Alignment of Very Large Numbers of Sequences. In: Russell DJ, editor. *Multiple Sequence Alignment Methods*. pp. 105–116.
34. Guoy M, Guindon S, Gascuel O (2010) SeaView Version 4: A Multiplatform Graphical User Interface for Sequence Alignment and Phylogenetic Tree Building. *Mol. Biol. Evol.* 27:221–224. doi: [10.1093/molbev/msp259](#) PMID: [19854763](#)
35. Valdar WSJ (2002) Scoring residue conservation. *Proteins-Structure Function and Bioinformatics* 48: 227–241.
36. Gabarra-Niecko V, Keely PJ, Schaller MD (2002) Characterization of an activated mutant of focal adhesion kinase: 'SuperFAK'. *Biochem. J.* 365:591–603. PMID: [11988069](#)

37. Zhou J, Bronowska A, Le Coq J, Lietha D, Graeter F (2015) Allosteric Regulation of Focal Adhesion Kinase by PIP<sub>2</sub> and ATP. *Biophys J* 108: 698–705. doi: [10.1016/j.bpj.2014.11.3454](https://doi.org/10.1016/j.bpj.2014.11.3454) PMID: [25650936](https://pubmed.ncbi.nlm.nih.gov/25650936/)
38. Robert X, Gouet P (2014) Deciphering key features in protein structures with the new ENDscript server. *Nucl. Acids Res.* 42: W320–W324. doi: [10.1093/nar/gku316](https://doi.org/10.1093/nar/gku316) PMID: [24753421](https://pubmed.ncbi.nlm.nih.gov/24753421/)
