# Supplementary material for: Novel Phosphotidylinositol 4,5-Bisphosphate Binding Sites on Focal Adhesion Kinase
Source: PubMed Central journal article supplement (PMC4505859; doi:10.1371/journal.pone.0132833), 2015-07-17
Supplement: pone.0132833.s008.pdf [file pone.0132833.s008.pdf]

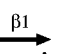

|               |   |                                                                                          |
|---------------|---|------------------------------------------------------------------------------------------|
| hs_Q05397     | 1 | .....MAAAYLDPNLNHTPNSSKTHLGTGMERSPGAMERVLKVFHYFES                                        |
| mmG7N067      | 1 | .....VLLTEYDRYLASSKIMAAAYLDPNLNHTPNSSKTHLGTGMERSPGAMERVLKVFHYFES                         |
| fd_A0A091D8K0 | 1 | MLELAGREALKPAGAVYMEKSGCSPFPMCWAKEYDRYLAPSKIMAAAYLDPNLNHTPNSSAKTHLGTGMERSPGAMERVLKVFHYFES |
| tc_L9KLU4     | 1 | .....MAAAYLDPNLNHTPNSSKTHLGTGMERSPGAMERVLKVFHYFES                                        |
| mf_G7PD12     | 1 | .....MAAAYLDPNLNHTPNSSKTHLGTGMERSPGAMERVLKVFHYFES                                        |
| rn_Q35346     | 1 | .....MAAAYLDPNLNHTPNSSKTHLGTGMERSPGAMERVLKVFHYFES                                        |
| cg_A0A061IJK6 | 1 | .....MINIWCFLLTKYDRYLASSKRMAAAYLDPNLNHTPNSSKTHLGTGMERSPGAMERVLKVFHYFEN                   |
| md_L5MIB4     | 1 | MLELAGRQALKPAGAGCMEKSGCSPFPVCWAKEYDRYLASSKIMAAAYLDPNLNHTPNSSAKTHLGTGMERSPGAMERVLKVFHYFES |
| gg_Q00944     | 1 | .....MAAAYLDPNLNHTPNSSAKTHLGTGMERSPGAMERVLKVFHYFEN                                       |
| af_A0A087RDA6 | 1 | .....EYDRYLASSKTMMAAYLDPNLNHTPNSSKTHLSTGMERSPGAMERVLKVFHYFEN                             |
| hs_H0YBP1     | 1 | .....XYDRYLASSKIMAAAYLDPNLNHTPNSSKTHLGTGMERSPGAMERVLKVFHYFES                             |
| cg_G3I7E2     | 1 | .....MAAAYLDPNLNHTPNSSKTHLGTGMERSPGAMERVLKVFHYFEN                                        |
| ca_A0A091IJF5 | 1 | .....EYDRYLASSKTMMAAYLDPNLNHTPNSSKTHLSTGMERSPGAMERVLKVFHYFEN                             |
| xl_Q91738     | 1 | .....MAAAYLDPNLNHTPNSSAKTHLGTGMERSPGAMERVLKVFHYFES                                       |
| hg_G5C8Y8     | 1 | .....MAAAYLDPNLNHTPNSSKTHLSSGVERSPTGMERVLKVFHYFES                                        |
| mf_U3FZE0     | 1 | .....MAAAYLDPNLNHTPNSSKTHLSSGVERSPTGMERVLKVFHYFES                                        |
| cl_R7VT98     | 1 | .....YDRYLASSKTMMAAYLDPNLNHTPNSSAKSHLSSGLERSPGAMERVLKVFHYFEN                             |
| dr_Q98SN4     | 1 | .....MAAAYLDPNPTHALNQGKVPFSA GMERTAAALERVLKVFHYFES                                       |
| nn_A0A091S5Z3 | 1 | .....MAAAYLDPNPTHALNQGKVPFSA GMERTAAALERVLKVFHYFES                                       |
| ac_A0A094K9V8 | 1 | .....MAAAYLDPNPTHALNQGKVPFSA GMERTAAALERVLKVFHYFES                                       |
| ta_A0A093F1Y1 | 1 | .....MAAAYLDPNPTHALNQGKVPFSA GMERTAAALERVLKVFHYFES                                       |
| pc_A0A091T5G4 | 1 | .....MAAAYLDPNPTHALNQGKVPFSA GMERTAAALERVLKVFHYFES                                       |
| fg_A0A093J4Z7 | 1 | .....MAAAYLDPNPTHALNQGKVPFSA GMERTAAALERVLKVFHYFES                                       |
| cb_S5U643     | 1 | .....MAAAYLDPNPTHALNQGKVPFSA GMERTAAALERVLKVFHYFES                                       |
| sm_A0A087U867 | 1 | .....MAAAYLDPNPTHALNQGKVPFSA GMERTAAALERVLKVFHYFES                                       |
| lh_A0A0A9XYV5 | 1 | .....MAAKIEDVTSKIR                                                                       |
| lv_Q7Z1D3     | 1 | .....MASKAREKMMLVQYPNG                                                                   |

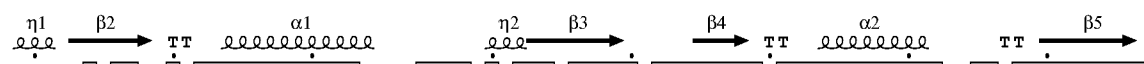

|               |    |            |           |               |       |         |            |               |              |      |          |                    |
|---------------|----|------------|-----------|---------------|-------|---------|------------|---------------|--------------|------|----------|--------------------|
| hs_Q05397     | 46 | NSEPTTWA   | STIRHGDA  | TDVRGIIQKIVD  | S.... | HKVKHVA | CYGFRLSHL  | RSEEVHHLV     | DMGVSSVREKYE | L    | AHHP     | EEWKYELRIRYLPK     |
| mmG7N067      | 61 | NSEPTTWA   | STIRHGDA  | TDVRGIIQKIVD  | S.... | HKVKHVA | CYGFRLSHL  | RSEEVHHLV     | DMGVSSVREKYE | L    | AHHP     | EEWKYELRIRYLPK     |
| fd_A0A091D8K0 | 90 | NSEPTTWA   | STIRHGDA  | TDVRGIIQKIVD  | S.... | HKVKHVA | CYGFRLSHL  | RSEEVHHLV     | DMGVSSVREKYE | L    | AHHP     | EEWKYELRIRYLPK     |
| tc_L9KLU4     | 46 | NSEPTTWA   | STIRHGDA  | TDVRGIIQKIVD  | S.... | HKVKHVA | CYGFRLSHL  | RSEEVHHLV     | DMGVSSVREKYE | L    | AHHP     | EEWKYELRIRYLPK     |
| mf_G7PD12     | 46 | NSEPTTWA   | STIRHGDA  | TDVRGIIQKIVD  | S.... | HKVKHVA | CYGFRLSHL  | RSEEVHHLV     | DMGVSSVREKYE | L    | AHHP     | EEWKYELRIRYLPK     |
| rn_Q35346     | 46 | NSEPTTWA   | STIRHGDA  | TDVRGIIQKIVD  | S.... | HKVKHVA | CYGFRLSHL  | RSEEVHHLV     | DMGVSSVREKYE | L    | AHHP     | EEWKYELRIRYLPK     |
| cg_A0A061IJK6 | 67 | SSEPTTWA   | STIRHGDA  | TDVRGIIQKIVD  | S.... | HKVKHVA | CYGFRLSHL  | RSEEVHHLV     | DMGVSSVREKYE | L    | AHHP     | EEWKYELRIRYLPK     |
| md_L5MIB4     | 90 | NSEPTTWA   | STIRHGDA  | TDVRGIIQKIVD  | S.... | HKVKHVA | CYGFRLSHL  | RSEEVHHLV     | DMGVSSVREKYE | L    | AHHP     | EEWKYELRIRYLPK     |
| gg_Q00944     | 46 | SSEPTTWA   | STIRHGDA  | TDVRGIIQKIVD  | S.... | HKVKHVA | CYGFRLSHL  | RSEEVHHLV     | DMGVSSVREKYE | L    | AHHP     | EEWKYELRIRYLPK     |
| af_A0A087RDA6 | 57 | SSEPTTWA   | STIRHGDA  | TDVRGIIQKIVD  | S.... | HKVKHVA | CYGFRLSHL  | RSEEVHHLV     | DMGVSSVREKYE | L    | AHHP     | EEWKYELRIRYLPK     |
| hs_H0YBP1     | 57 | NSEPTTWA   | STIRHGDA  | TDVRGIIQKIVD  | S.... | HKVKHVA | CYGFRLSHL  | RSEEVHHLV     | DMGVSSVREKYE | L    | AHHP     | EEWKYELRIRYLPK     |
| cg_G3I7E2     | 46 | SSEPTTWA   | STIRHGDA  | TDVRGIIQKIVD  | S.... | HKVKHVA | CYGFRLSHL  | RSEEVHHLV     | DMGVSSVREKYE | L    | AHHP     | EEWKYELRIRYLPK     |
| ca_A0A091IJF5 | 57 | SSEPTTWA   | STIRHGDA  | TDVRGIIQKIVD  | S.... | HKVKHVA | CYGFRLSHL  | RSEEVHHLV     | DMGVSSVREKYE | L    | AHHP     | EEWKYELRIRYLPK     |
| xl_Q91738     | 46 | NNEPATWA   | SNIRHGDA  | TDVRGIIQKIVD  | S.... | HKVKNVA | SYGLRLSHL  | HSEEVHHLV     | DIGVSHIREKYE | Q    | SHHP     | EEWKYELRIRYLPK     |
| hg_G5C8Y8     | 1  | MMMMKDKILM | . . . . . | KVMRMKGIQKIVD | S.... | HKVKHVA | CYGFRLSHL  | RSEEVHHLV     | DMGVSSVREKYE | L    | AHHP     | EEWKYELRIRYLPK     |
| mf_U3FZE0     | 46 | NNEPTTWA   | STIRHGDA  | TDVWGIIQKIVD  | S.... | HKVKNVA | CYGFRLSHL  | RSEEVHHLV     | DMGVSSVREKYE | L    | AHHP     | EEWKYELRIRYLPK     |
| cl_R7VT98     | 56 | SSEPTTWA   | STIRHGDA  | TDVRGIIQKIVD  | S.... | HKVKHVA | CYGFRLSHL  | RSEEVHHLV     | DMGVSSVREKYE | L    | AHHP     | EEWKYELRIRYLPK     |
| dr_Q98SN4     | 46 | SSEPCSWA   | SNIRHGDS  | TDVRGIIQKILD  | I.... | HKVRCV  | SFCFLRLSHL | RTEHHLV       | DMGVSHVREKYE | H    | SHHP     | DDRWYELRIRYLPK     |
| nn_A0A091S5Z3 | 1  | .....      | .....     | GIIQKIVD      | S.... | HKVKNVA | CYGFRLSHL  | RSEEVHHLV     | DMGVSSVREKYE | L    | AHHP     | EEWKYELRIRYLPK     |
| ac_A0A094K9V8 | 1  | .....      | .....     | GIIQKIVD      | S.... | HKVKNVA | CYGFRLSHL  | RSEEVHHLV     | DMGVSSVREKYE | L    | AHHP     | EEWKYELRIRYLPK     |
| ta_A0A093F1Y1 | 1  | .....      | .....     | GIIQKIVD      | S.... | HKVKNVA | CYGFRLSHL  | RSEEVHHLV     | DMGVSSVREKYE | L    | AHHP     | EEWKYELRIRYLPK     |
| pc_A0A091T5G4 | 1  | .....      | .....     | GIIQKIVD      | S.... | HKVKNVA | CYGFRLSHL  | RSEEVHHLV     | DMGVSSVREKYE | L    | AHHP     | EEWKYELRIRYLPK     |
| fg_A0A093J4Z7 | 1  | .....      | .....     | GIIQKIVD      | S.... | HKVKNVA | CYGFRLSHL  | RSEEVHHLV     | DMGVSSVREKYE | L    | AHHP     | EEWKYELRIRYLPK     |
| cb_S5U643     | 1  | .....      | .....     | GIIQKIVD      | S.... | HKVKNVA | CYGFRLSHL  | RSEEVHHLV     | DMGVSSVREKYE | L    | AHHP     | EEWKYELRIRYLPK     |
| sm_A0A087U867 | 1  | .....      | .....     | GIIQKIVD      | S.... | HKVKNVA | CYGFRLSHL  | RSEEVHHLV     | DMGVSSVREKYE | L    | AHHP     | EEWKYELRIRYLPK     |
| lh_A0A0A9XYV5 | 14 | VQLPSGIF   | PTVKHNEST | DIRSIIAGVT    | GTLD  | GTRRI   | TCYGLRIA   | AHLPSADVYWLHR | DATMGQVVS    | RFSD | SHHP     | IAEWSFELRVFVPPK    |
| lv_Q7Z1D3     | 19 | . . . . .  | SFNSVKCME | TDIKNVIHAVVG  | KLAR  | GERRA   | FESFAV     | RLQHTL        | SEECHWLR     | DLTV | GQVKKYEA | YHPAEEWKYELRIRYLPK |

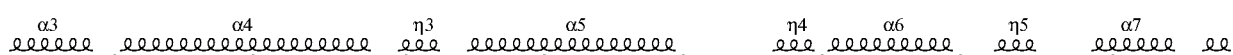

|               |     |                   |             |          |               |               |             |              |                  |         |             |             |
|---------------|-----|-------------------|-------------|----------|---------------|---------------|-------------|--------------|------------------|---------|-------------|-------------|
| hs_Q05397     | 132 | GFLNQFTEDKPTLNFFY | QOVKSDYMLEI | ADQVDQEI | ALKLGCLEIRRSY | W             | EMRGNALEKKS | SNYEVLEKD    | VGLKRFF          | P       | PKSLSDSVKAK |             |
| mmG7N067      | 147 | GFLNQFTEDKPTLNFFY | QOVKSDYMLEI | ADQVDQEI | ALKLGCLEIRRSY | W             | EMRGNALEKKS | SNYEVLEKD    | VGLKRFF          | P       | PKSLSDSVKAK |             |
| fd_A0A091D8K0 | 176 | GFLNQFTEDKPTLNFFY | QOVKSDYMLEI | ADQVDQEI | ALKLGCLEIRRSY | W             | EMRGNALEKKS | SNYEVLEKD    | VGLKRFF          | P       | PKSLSDSVKAK |             |
| tc_L9KLU4     | 132 | GFLNQFTEDKPTLNFFY | QOVKSDYMLEI | ADQVDQEI | ALKLGCLEIRRSY | W             | EMRGNALEKKS | SNYEVLEKD    | VGLKRFF          | P       | PKSLSDSVKAK |             |
| mf_G7PD12     | 132 | GFLNQFTEDKPTLNFFY | QOVKSDYMLEI | ADQVDQEI | ALKLGCLEIRRSY | W             | EMRGNALEKKS | SNYEVLEKD    | VGLKRFF          | P       | PKSLSDSVKAK |             |
| rn_Q35346     | 132 | GFLNQFTEDKPTLNFFY | QOVKSDYMLEI | ADQVDQEI | ALKLGCLEIRRSY | W             | EMRGNALEKKS | SNYEVLEKD    | VGLKRFF          | P       | PKSLSDSVKAK |             |
| cg_A0A061IJK6 | 153 | GFLNQFTEDKPTLNFFY | QOVKSDYMLEI | ADQVDQEI | ALKLGCLEIRRSY | W             | EMRGNALEKKS | SNYEVLEKD    | VGLKRFF          | P       | PKSLSDSVKAK |             |
| md_L5MIB4     | 176 | GFLNQFTEDKPTLNFFY | QOVKSDYMLEI | ADQVDQEI | ALKLGCLEIRRSY | W             | EMRGNALEKKS | SNYEVLEKD    | VGLKRFF          | P       | PKSLSDSVKAK |             |
| gg_Q00944     | 132 | GFLNQFTEDKPTLNFFY | QOVKSDYMLEI | ADQVDQEI | ALKLGCLEIRRSY | W             | EMRGNALEKKS | SNYEVLEKD    | VGLKRFF          | P       | PKSLSDSVKAK |             |
| af_A0A087RDA6 | 143 | GFLNQFTEDKPTLNFFY | QOVKSDYMLEI | ADQVDQEI | ALKLGCLEIRRSY | W             | EMRGNALEKKS | SNYEVLEKD    | VGLKRFF          | P       | PKSLSDSVKAK |             |
| hs_H0YBP1     | 143 | GFLNQFTEDKPTLNFFY | QOVKSDYMLEI | ADQVDQEI | ALKLGCLEIRRSY | W             | EMRGNALEKKS | SNYEVLEKD    | VGLKRFF          | P       | PKSLSDSVKAK |             |
| cg_G3I7E2     | 132 | GFLNQFTEDKPTLNFFY | QOVKSDYMLEI | ADQVDQEI | ALKLGCLEIRRSY | W             | EMRGNALEKKS | SNYEVLEKD    | VGLKRFF          | P       | PKSLSDSVKAK |             |
| ca_A0A091IJF5 | 143 | GFLNQFTEDKPTLNFFY | QOVKSDYMLEI | ADQVDQEI | ALKLGCLEIRRSY | W             | EMRGNALEKKS | SNYEVLEKD    | VGLKRFF          | P       | PKSLSDSVKAK |             |
| xl_Q91738     | 132 | GFLNQFTEDKPTLNFFY | QOVKSDYMLEI | ADQVDQEI | ALKLGCLEIRRSY | W             | EMRGNALEKKS | SNYEVLEKD    | VGLKRFF          | P       | PKSLSDSVKAK |             |
| hg_G5C8Y8     | 84  | GFLNQFTEDKPTLNFFY | QOVKSDYMLEI | ADQVDQEI | ALKLGCLEIRRSY | W             | EMRGNALEKKS | SNYEVLEKD    | VGLKRFF          | P       | PKSLSDSVKAK |             |
| mf_U3FZE0     | 132 | GFLNQFTEDKPTLNFFY | QOVKSDYMLEI | ADQVDQEI | ALKLGCLEIRRSY | W             | EMRGNALEKKS | SNYEVLEKD    | VGLKRFF          | P       | PKSLSDSVKAK |             |
| cl_R7VT98     | 142 | GFLNQFTEDKPTLNFFY | QOVKSDYMLEI | ADQVDQEI | ALKLGCLEIRRSY | W             | EMRGNALEKKS | SNYEVLEKD    | VGLKRFF          | P       | PKSLSDSVKAK |             |
| dr_Q98SN4     | 132 | GFLNQFTEDKPTLNFFY | QOVKSDYMLEI | ADQVDQEI | ALKLGCLEIRRSY | W             | EMRGNALEKKS | SNYEVLEKD    | VGLKRFF          | P       | PKSLSDSVKAK |             |
| nn_A0A091S5Z3 | 1   | .....             | .....       | ADQVDQEI | ALKLGCLEIRRSY | W             | EMRGNALEKKS | SNYEVLEKD    | VGLKRFF          | P       | PKSLSDSVKAK |             |
| ac_A0A094K9V8 | 67  | GFLNQFTEDKPTLNFFY | QOVKSDYMLEI | ADQVDQEI | ALKLGCLEIRRSY | W             | EMRGNALEKKS | SNYEVLEKD    | VGLKRFF          | P       | PKSLSDSVKAK |             |
| ta_A0A093F1Y1 | 1   | .....             | .....       | ADQVDQEI | ALKLGCLEIRRSY | W             | EMRGNALEKKS | SNYEVLEKD    | VGLKRFF          | P       | PKSLSDSVKAK |             |
| pc_A0A091T5G4 | 1   | .....             | .....       | ADQVDQEI | ALKLGCLEIRRSY | W             | EMRGNALEKKS | SNYEVLEKD    | VGLKRFF          | P       | PKSLSDSVKAK |             |
| fg_A0A093J4Z7 | 1   | .....             | .....       | ADQVDQEI | ALKLGCLEIRRSY | W             | EMRGNALEKKS | SNYEVLEKD    | VGLKRFF          | P       | PKSLSDSVKAK |             |
| cb_S5U643     | 15  | SFLNQFTEDQPALNYFY | HQVRSYMMEV  | ADHV     | DQDI          | ALKLGCLEIRRF  | FR          | EMPGNALDKKS  | SNYELLEKD        | VGLRRFF | P           | PKSLSDSVKPK |
| sm_A0A087U867 | 47  | DIRDMFEDKVTFLYFY  | QOVKNDYLS   | .L       | DIEIDQELAI    | QCCIEIRRF     | FK          | DMTHVALDKKS  | NFEFLERDIGLHKL   | P       | PSRVTINNKPK |             |
| lh_A0A0A9XYV5 | 102 | SLAELYEKDRLTFLFFY | QVRSYDLTNP  | A        | ASKIELD       | TAVTVACYA     | KHFF        | DLPMALDKKS   | SNVEYLEKEVGLGRFF | P       | PAKIMETHKTK |             |
| lv_Q7Z1D3     | 102 | NYHELLEKDKVSFFYFY | QVRC DYMNEV | A        | ELVQD         | DISLGLCLEMRFF | FK          | DMPQIALDKKAN | FDYLEKEIGLKRFF   | P       | PKNVINDTKPK |             |

|               |     | α8                                            | η6 | α9 | η7 | TT | β6 | β7 | β8 | β9 | η8 | β10 | β11 |
|---------------|-----|-----------------------------------------------|----|----|----|----|----|----|----|----|----|-----|-----|
| hs_Q05397     | 219 | TLRKLIIQQTFRQFANLNREESILKFFFEILSPVYRFDKCECFKC |    |    |    |    |    |    |    |    |    |     |     |
| mmG7N067      | 234 | TLRKLIIQQTFRQFANLNREESILKFFFEILSPVYRFDKCECFKC |    |    |    |    |    |    |    |    |    |     |     |
| fd_A0A091D8K0 | 263 | TLRKLIIQQTFRQFANLNREESILKFFFEILSPVYRFDKCECFKC |    |    |    |    |    |    |    |    |    |     |     |
| tc_L9KLU4     | 219 | TLRKLIIQQTFRQFANLNREESILKFFFEILSPVYRFDKCECFKC |    |    |    |    |    |    |    |    |    |     |     |
| mf_G7PD12     | 219 | TLRKLIIQQTFRQFANLNREESILKFFFEILSPVYRFDKCECFKC |    |    |    |    |    |    |    |    |    |     |     |
| rn_Q35346     | 219 | TLRKLIIQQTFRQFANLNREESILKFFFEILSPVYRFDKCECFKC |    |    |    |    |    |    |    |    |    |     |     |
| cg_A0A061IJK6 | 240 | TLRKLIIQQTFRQFANLNREESILKFFFEILSPVYRFDKCECFKC |    |    |    |    |    |    |    |    |    |     |     |
| md_L5MIB4     | 263 | TLRKLIIQQTFRQFANLNREESILKFFFEILSPVYRFDKCECFKC |    |    |    |    |    |    |    |    |    |     |     |
| gg_Q00944     | 219 | TLRKLIIQQTFRQFANLNREESILKFFFEILSPVYRFDKCECFKC |    |    |    |    |    |    |    |    |    |     |     |
| af_A0A087RDA6 | 230 | TLRKLIIQQTFRQFANLNREESILKFFFEILSPVYRFDKCECFKC |    |    |    |    |    |    |    |    |    |     |     |
| hs_H0YBP1     | 230 | TLRKLIIQQTFRQFANLNREESILKFFFEILSPVYRFDKCECFKC |    |    |    |    |    |    |    |    |    |     |     |
| cg_G3I7E2     | 220 | TLRKLIIQQTFRQFANLNREESILKFFFEILSPVYRFDKCECFKC |    |    |    |    |    |    |    |    |    |     |     |
| ca_A0A091IJF5 | 230 | TLRKLIIQQTFRQFANLNREESILKFFFEILSPVYRFDKCECFKC |    |    |    |    |    |    |    |    |    |     |     |
| x1_Q91738     | 219 | TLRKLIIQQTFRQFANLNREESILKFFFEILSPVYRFDKCECFKC |    |    |    |    |    |    |    |    |    |     |     |
| hg_G5C8Y8     | 171 | TLRKLIIQQTFRQFANLNREESILKFFFEILSPVYRFDKCECFKC |    |    |    |    |    |    |    |    |    |     |     |
| mf_U3FZE0     | 219 | NLRKMIQQTFRQFANLNREESILKFFFEILSPVYRFDKCECFKC  |    |    |    |    |    |    |    |    |    |     |     |
| cl_R7VT98     | 229 | TIPVNY...LLLKKIARYQIVTF...S.PYRNNQRIPGC       |    |    |    |    |    |    |    |    |    |     |     |
| dr_Q98SN4     | 219 | SLRKLIIQQTFRQFANLNREESILKFFFEILSPVYRFDKCECFKC |    |    |    |    |    |    |    |    |    |     |     |
| nn_A0A091S5Z3 | 69  | TLRKLIIQQTFRQFANLNREESILKFFFEILSPVYRFDKCECFKC |    |    |    |    |    |    |    |    |    |     |     |
| ac_A0A094K9V8 | 154 | TLRKLIIQQTFRQFANLNREESILKFFFEILSPVYRFDKCECFKC |    |    |    |    |    |    |    |    |    |     |     |
| ta_A0A093F1Y1 | 69  | TLRKLIIQQTFRQFANLNREESILKFFFEILSPVYRFDKCECFKC |    |    |    |    |    |    |    |    |    |     |     |
| pc_A0A091T5G4 |     |                                               |    |    |    |    |    |    |    |    |    |     |     |
| fg_A0A093J4Z7 |     |                                               |    |    |    |    |    |    |    |    |    |     |     |
| cb_S5U643     | 102 | TLRKSIIQQTFRQFANLNREESIVKFFFEILSPVYRFDKCECFKC |    |    |    |    |    |    |    |    |    |     |     |
| sm_A0A087U867 | 133 | ALRKVIQSHFKRFASLSEVDCMFMFLSKVHPVIVKYDQESFRC   |    |    |    |    |    |    |    |    |    |     |     |
| lh_A0A0A9XYV5 | 190 | ALRKLIIQGHFKKICISDRDCLLKFETLRTIYAFDEERFQC     |    |    |    |    |    |    |    |    |    |     |     |
| lv_Q7Z1D3     | 189 | NLRKLIIQYFKQFANLNREESQCVKFFFEVLTVHRRFDHEKFKC  |    |    |    |    |    |    |    |    |    |     |     |

|               |     | β12                     | β13                           | α10                      |
|---------------|-----|-------------------------|-------------------------------|--------------------------|
| hs_Q05397     | 307 | SEDK...DRKGMLQLKIAGAPE  | PLTVTAPSLTIAENMADLIDGYCRLVNG  | TQSFIIRPQKE              |
| mmG7N067      | 322 | SEDK...DRKGMLQLKIAGAPE  | PLTVTAPSLTIAENMADLIDGYCRLVNG  | TQSFIIRPQKE              |
| fd_A0A091D8K0 | 351 | SEDK...DRKGMLQLKIAGAPE  | PLTVTAPSLTIAENMADLIDGYCRLVNG  | TQSFIIRPQKE              |
| tc_L9KLU4     | 307 | SEDK...DRKGMLQLKIAGAPE  | PLTVTAPSLTIAENMADLIDGYCRLVNG  | TQSFIIRPQKE              |
| mf_G7PD12     | 307 | SEDK...DRKGMLQLKIAGAPE  | PLTVTAPSLTIAENMADLIDGYCRLVNG  | TQSFIIRPQKE              |
| rn_Q35346     | 307 | SEDK...DRKGMLQLKIAGAPE  | PLTVTAPSLTIAENMADLIDGYCRLVNG  | TQSFIIRPQKE              |
| cg_A0A061IJK6 | 328 | SEDK...DRKGMLQLKIAGAPE  | PLTVTAPSLTIAENMADLIDGYCRLVNG  | TQSFIIRPQKE              |
| md_L5MIB4     | 351 | SEDK...DRKGMLQLKIAGAPE  | PLTVTAPSLTIAENMADLIDGYCRLVNG  | TQSFIIRPQKE              |
| gg_Q00944     | 307 | SEDK...DRKGMLQLKIAGAPE  | PLTVTAPSLTIAENMADLIDGYCRLVNG  | TQSFIIRPQKE              |
| af_A0A087RDA6 | 318 | SEDK...DRKGMLQLKIAGAPE  | PLTVTAPSLTIAENMADLIDGYCRLVNG  | TQSFIIRPQKE              |
| hs_H0YBP1     | 318 | SEDK...DRKGMLQLKIAGAPE  | PLTVTAPSLTIAENMADLIDGYCRLVNG  | TQSFIIRPQKE              |
| cg_G3I7E2     | 282 | SEDK...DRKGMLQLKIAGAPE  | PLTVTAPSLTIAENMADLIDGYCRLVNG  | TQSFIIRPQKE              |
| ca_A0A091IJF5 | 318 | SEDK...DRKGMLQLKIAGAPE  | PLTVTAPSLTIAENMADLIDGYCRLVNG  | TQSFIIRPQKE              |
| x1_Q91738     | 307 | SEDK...DRKGMLQLKIAGAPE  | PLTVTAPSLTIAENMADLIDGYCRLVNG  | TQSFIIRPQKE              |
| hg_G5C8Y8     | 259 | SEDK...DRKGMLQLKIAGAPE  | PLTVTAPSLTIAENMADLIDGYCRLVNG  | TQSFIIRPQKE              |
| mf_U3FZE0     | 307 | NEDK...DRKGMLQMKIAGAPE  | PLTVTAPSLTIAENMADLIDGYCRLVNG  | TQSFIIRPQKE              |
| cl_R7VT98     | 298 | TEGD...STTSLGSLGQALPPS  | PCTMTAPSLTIAENMADLIDGYCRLVNG  | TQSFIIRPQKE              |
| dr_Q98SN4     | 306 | ER...ERKGMILLD VAGAPE   | PLTVTTTTLNTIAENMADLIDGYCRLVNG | SSSFIVRVQKE              |
| nn_A0A091S5Z3 | 157 | SEDK...DRKGMLQLKIAGAPE  | PLTVTAPSLTIAENMADLIDGYCRLVNG  | TQSFIIRPQKE              |
| ac_A0A094K9V8 | 242 | SEDK...DRKGMLQLKIAGAPE  | PLTVTAPSLTIAENMADLIDGYCRLVNG  | TQSFIIRPQKE              |
| ta_A0A093F1Y1 | 157 | SEDK...DRKGMLQLKIAGAPE  | PLTVTAPSLTIAENMADLIDGYCRLVNG  | TQSFIIRPQKE              |
| pc_A0A091T5G4 | 1   |                         |                               |                          |
| fg_A0A093J4Z7 | 1   |                         |                               |                          |
| cb_S5U643     | 189 | EQ...EKKGILQLD VAGAAE   | PLKVTTPCVSTAENMADLIDGYCRLVNG  | SISFIVRVQKE              |
| sm_A0A087U867 | 221 | TSDVSTSKPVLQKIDGASE     | MLSISCPASVAESIALIDGYCQLVHG    | TKKSFWTQKGGRTSKSRHRHNST  |
| lh_A0A0A9XYV5 | 278 | SGCK...THPKALLRLSVVDASE | ALTISCANLSEAESLAHLLDGYWRLENP  | SKDKHIWDRDTSKKS          |
| lv_Q7Z1D3     | 276 | STDN...DKKGLLQLKIAGANE  | SVYITTPSPSTIAEDMADLIDGYCRLVNL | TEQSLIIRAQQAENAVTRRSAKKA |

|               |     | β14               | η9                 |                      |           |
|---------------|-----|-------------------|--------------------|----------------------|-----------|
| hs_Q05397     | 366 | GERALPSIPKLANSEKQ | GMRTHAVSVS         | ETDDYAEIIDEEDTYTMPST | TRDYE     |
| mmG7N067      | 381 | GERALPSIPKLANSEKQ | GMRTHAVSVS         | ETDDYAEIIDEEDTYTMPST | TRDYE     |
| fd_A0A091D8K0 | 410 | GERALPSIPKLANSEKQ | GVRTHAVSVS         | ETDDYAEIIDEEDTYTMPST | TRDYE     |
| tc_L9KLU4     | 366 | GERALPSIPKLANSEKQ | GVRTHAVSVS         | ETDDYAEIIDEEDTYTMPST | TRDYE     |
| mf_G7PD12     | 366 | GERALPSIPKLANSEKQ | GMRTHAVSVS         | ETDDYAEIIDEEDTYTMPST | TRDYE     |
| rn_Q35346     | 366 | GERALPSIPKLANSEKQ | GMRTHAVSVS         | ETDDYAEIIDEEDTYTMPST | TRDYE     |
| cg_A0A061IJK6 | 387 | GERALPSIPKLANSEKQ | GIRTHAVSVS         | ETDDYAEIIDEEDTYTMPST | TRDYE     |
| md_L5MIB4     | 410 | GERALPSIPKLANSEKQ | GVRTHAVSVS         | ETDDYAEIIDEEDTYTMPST | TRDYE     |
| gg_Q00944     | 366 | GERALPSIPKLANNEKQ | GVRSHAVSVS         | ETDDYAEIIDEEDTYTMPST | RDYE      |
| af_A0A087RDA6 | 377 | GERALPSIPKLANNEKQ | GVRSHAVSVS         | ETDDYAEIIDEEDTYTMPST | RDYE      |
| hs_H0YBP1     | 377 | GERALPSIPKLANSEKQ | GMRTHAVSVS         | ETDDYAEIIDEEDTYTMPST | TRDYE     |
| cg_G3I7E2     | 341 | GERALPSIPKLANSEKQ | GIRTHAVSVS         | ETDDYAEIIDEEDTYTMPST | TRDYE     |
| ca_A0A091IJF5 | 377 | GERALPSIPKLANNEKQ | GVRSHAVSVS         | ETDDYAEIIDEEDTYTMPST | RDYE      |
| x1_Q91738     | 366 | GERALPSIPKLANNEKH | GVRPHAVSVS         | ETDDYAEIIDEEDTYTMPST | SKSYGLDEA |
| hg_G5C8Y8     | 318 | GERALPSIPKLANNEKQ | GVRTHAVSVS         | ETDDYAEIIDEEDTYTMPST | RDYE      |
| mf_U3FZE0     | 366 | GERALPSIPKLANNEKQ | GIRSHAVSVS         | ETDDYAEIIDEEDTYTMPST | RDYE      |
| cl_R7VT98     | 357 | GERALPSIPKLANNEKQ | GMRSHAVSVS         | ETDDYAEIIDEEDTYTMPST | RDYE      |
| dr_Q98SN4     | 363 | GERALPSIPKAPKSNH  | EKRRLQGVRAKAVSI    | ETDDYAEIIDEEDTYTMPST | RDYE      |
| nn_A0A091S5Z3 | 216 | GERALPSIPKLANNEKQ | GVRSHAVSVS         | ETDDYAEIIDEEDTYTMPST | RDYE      |
| ac_A0A094K9V8 | 301 | GERALPSIPKLANNEKQ | GVRSHAVSVS         | ETDDYAEIIDEEDTYTMPST | RDYE      |
| ta_A0A093F1Y1 | 216 | GERALPSIPKLANNEKQ | GVRSHAVSVS         | ETDDYAEIIDEEDTYTMPST | RDYE      |
| pc_A0A091T5G4 | 2   | GERALPSIPKLANNEKQ | GVRSHAVSVS         | ETDDYAEIIDEEDTYTMPST | RDYE      |
| fg_A0A093J4Z7 | 2   | GERALPSIPKLANNEKQ | GVRSHAVSVS         | ETDDYAEIIDEEDTYTMPST | RDYE      |
| cb_S5U643     | 246 | GERALPSIPKAPKSNH  | DKRRLQSVRAKAVSV    | ETDDYAEIIDEEDTYTMPST | RDYE      |
| sm_A0A087U867 | 292 | NFSNLPSSPEK       |                    | ETDDYAEIIVEEGDYSTP   | KDYE      |
| lh_A0A0A9XYV5 | 341 | QEPK              |                    | ETDDYAEIPEEGDYSTP    | KDYE      |
| lv_Q7Z1D3     | 363 | RNAVQDVTC         | GDRLALPSIPKDSRLPST | ETDDYAEIIVDDDYAMP    | KDYE      |



QQQQ

|               |     |                                                                    |           |       |       |     |                |
|---------------|-----|--------------------------------------------------------------------|-----------|-------|-------|-----|----------------|
| hs_Q05397     | 682 | EEKAQQEEERMRMESRRQATVSWDGGSGDEAPPKPSRPGYSPRSSEGFYPSPOHMVQ          | TNHYQVSGY | GSHGI | TAMA  | GS  | IYPGQASL       |
| mmG7N067      | 697 | EEKAQQEEERMRMESRRQATVSWDGGSGDEAPPKPSRPGYSPRSSEGFYPSPOHMVQ          | TNHYQVSGY | GSHGI | TAMA  | GS  | IYPGQASL       |
| fd_A0A091D8K0 | 726 | EEKAQQEEERMRMESRRQASVSWDGGSGDEAPPKPSRPGYSPRSSEGFYPSPOHMVQ          | TNHYQVSGY | GSHGI | TAMP  | GS  | IYPGQASL       |
| tc_I9KLU4     | 682 | EEKVQQEEERMRMESRRQATVSWDGGSGDEAPPKPSRPGYSPRSSEGFYPSPOHMVQ          | TNHYQVSGY | GSHGI | TAMA  | GS  | IYPGQASL       |
| mf_G7PD12     | 682 | EEKAQQEEERMRMESRRQATVSWDGGSGDEAPPKPSRPGYSPRSSEGFYPSPOHMVQ          | TNHYQVSGY | GSHGI | TAMA  | GS  | IYPGQASL       |
| rn_O35346     | 682 | EEKVQQEEERMRMESRRQATVSWDGGSGDEAPPKPSRPGYSPRSSEGFYPSPOHMVQ          | TNHYQVSGY | GSHGI | TAMA  | GS  | IYPGQASL       |
| cg_A0A061IJK6 | 703 | EEKVQQEEERMRMESRRQATVSWDGGSGDEAPPKPSRPGYSPRSSEGFYPSPOHMVQ          | TNHYQVSGY | GSHGI | PAMA  | GS  | IYPGQASL       |
| md_L5MIB4     | 726 | EEKQHEERVRMESRRQVTVSWDGGSGDEAPPKPSRPGYSPRSSEGFYPSPOHMVQ            | TNHYQVSGY | GSHGI | PALAG | SM  | YPPGQASL       |
| gg_Q00944     | 682 | EEKLQQEEERMRMESRRQVTVSWDGGSGDEAPPKPSRPGYSPRSSEGFYPSPOHMVQ          | PNHYQVSGY | GSHGI | PAMA  | GS  | IYPGQASL       |
| af_A0A087RDA6 | 695 | EEKLQQEEERMRMESRRQVTVSWDGGSGDEAPPKPSRPGYSPRSSEGFYPSPOHMVQ          | PNHYQVSGY | GSHGI | PAMA  | GS  | IYPGQASL       |
| hs_H0YBP1     | 693 | EEKAQQEEERMRMESRRQATVSWDGGSGDEAPPKPSRPGYSPRSSEGFYPSPOHMVQ          | TNHYQVSGY | GSHGI | TAMA  | GS  | IYPGQASL       |
| cg_G3I7E2     | 657 | EEKVQQEEERMRMESRRQATVSWDGGSGDEAPPKPSRPGYSPRSSEGFYPSPOHMVQ          | TNHYQVSGY | GSHGI | PAMA  | GS  | IYPGQASL       |
| ca_A0A091IJF5 | 693 | EEKLQQEEERMRMESRRQVTVSWDGGSGDEAPPKPSRPGYSPRSSEGFYPSPOHMVQ          | PNHYQVSGY | GSHGI | PAMA  | GS  | IYPGQASL       |
| xL_Q91738     | 695 | EEKLQQEEERMRMESRRQVTVSWDGGSGDEAPPKPSRPGYSPRSSEGFYPSPOHMVQ          | PNHYQVSGF | VAHGI | PMS   | GN  | MYPPGQASV      |
| hg_G5C8Y8     | 640 | EEKAQQEEERMRMESRRQATVSWDGGSGDEAPPKPSRPGYSPRSSEGFYPSPOHMVQ          | PNHYQVSGY | GSHGI | TAMP  | GS  | IYPGQASL       |
| mf_U3FZE0     | 682 | EEKLQQEEERIRMESRRQVTVSWDGGSDDAPPKPSRPGYSPRSSEGFYPSPOHMIQ           | PNHYQD    | ...   | ...   | ... | ...            |
| c1_R7VT98     | 673 | EEKLQQEEERMRMESRRQVTVSWDGGSGDEAPPKPSRPGYSPRSSEGFYPSPOHMVQ          | PNHYQVSGY | GSHGL | PAMA  | GS  | IYPGQASL       |
| dr_Q98SN4     | 684 | EEKAQQEEERSRMEMRRQVTVSWDGGSGDEAPPKPSRPGYSPRSSEGFYPSPOHMQ           | HNHYQVSGY | GPHGL | LSVP  | GGL | YPPQATV        |
| nn_A0A091SSZ3 | 532 | EEKLQQEEERMRMESRRQVTVSWDGGSGDEAPPKPSRPGYSPRSSEGFYPSPOHMVQ          | PNHYQVSGY | GSHGI | PAMA  | GS  | IYPGQASL       |
| ac_A0A094K9V8 | 617 | EEKLQQEEERMRMESRRQVTVSWDGGSGDEAPPKPSRPGYSPRSSEGFYPSPOHMVQ          | PNHYQVSGY | GSHGI | PAMA  | GS  | IYPGQASL       |
| ta_A0A093F1Y1 | 532 | EEKLQQEEERMRMESRRQVTVSWDGGSGDEAPPKPSRPGYSPRSSEGFYPSPOHMVQ          | PNHYQVSGY | GSHGI | PAMA  | GS  | IYPGQASL       |
| pc_A0A091T5G4 | 318 | EEKLQQEEERMRMESRRQVTVSWDGGSGDEAPPKPSRPGYSPRSSEGFYPSPOHMVQ          | PNHYQVSGY | GSHGI | PAMA  | GS  | IYPGQASL       |
| fg_A0A093J4Z7 | 318 | EEKLQQEEERMRMESRRQVTVSWDGGSGDEAPPKPSRPGYSPRSSEGFYPSPOHMVQ          | PNHYQVSGY | GSHGI | PAMA  | GS  | IYPGQASL       |
| cb_S5U643     | 567 | EE                                                                 | ...       | ...   | ...   | ... | ...            |
| sm_A0A087U867 | 597 | EERRQQEEV MKRENRR I HAMS WGS SC SDE PPKPS RLPVD QSSVASLPLRVNSNLVHS | SFYST     | GT    | ...   | ETV | YME            |
| lh_A0A0A9XYV5 | 640 | EEKSQQQEELRRENRRVQAMSWGSSFDSDDKTASGGTTYIVAQ                        | DPQQLAQ   | LMKEA | ...   | EVT | KRLNPSLYNAAASP |
| lv_Q7Z1D3     | 697 | EEKKEQEEAALKQEKRRILSTWGFPEEPPPKERTIQEQ                             | ...       | ...   | ...   | ... | ...            |

▲ = Group II amino acid residues. Residue conservation with respect to human version of FAK (hs\_Q05397) according to Scorecons is as follows: R508 = 100%; R514 = 78.5%; K515 = 100%; K578 = 100%; K621 = 100%; K627 = 95%.
